# Supplementary material for: Mammalian adaptation of influenza A(H7N9) virus is limited by a narrow genetic bottleneck
Source: PubMed Central journal article supplement (PMC4403340; doi:10.1038/ncomms7553), 2015-04-08
Supplement: ncomms7553-s1.pdf [file ncomms7553-s1.pdf]

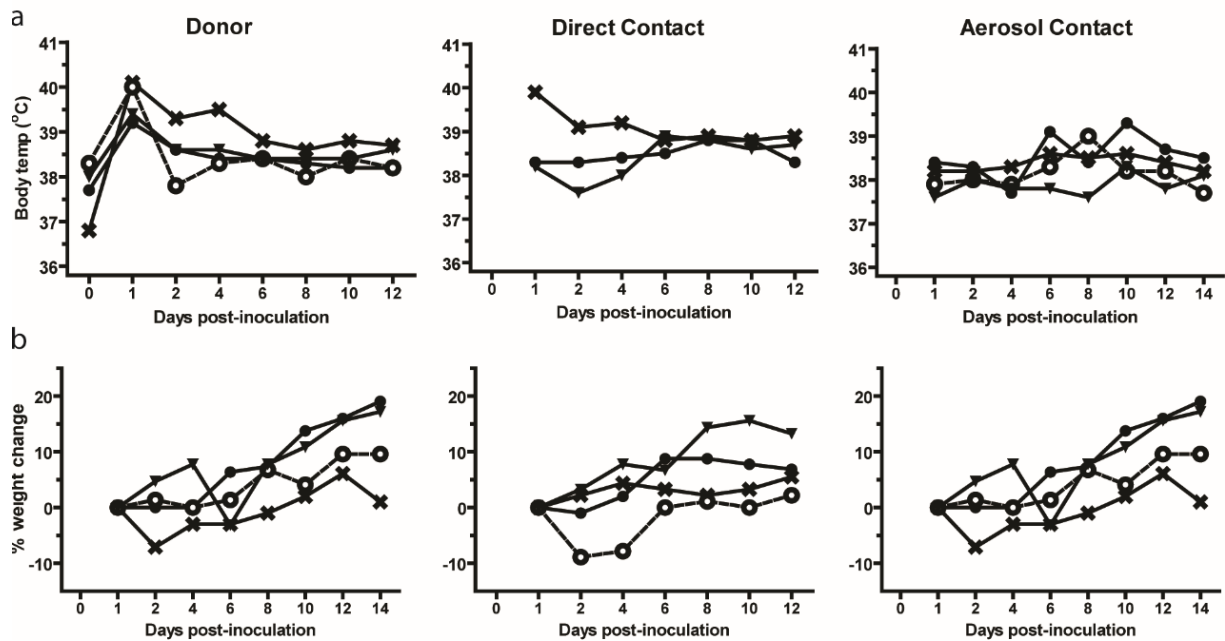

**Supplementary Figure 1 | Weight and body temperature of ferrets inoculated with A/Anhui/1/2013 (H7N9) influenza virus.** (a) Body temperature and (b) weight change of ferrets after intranasal inoculation with  $10^6$  TCID<sub>50</sub> of A/Anhui/1/2013 (H7N9) influenza virus, direct contact, and aerosol contact ( $n = 4$  per group). Body temperature is shown for only 3 direct contact ferrets, as one temperature probe was faulty.

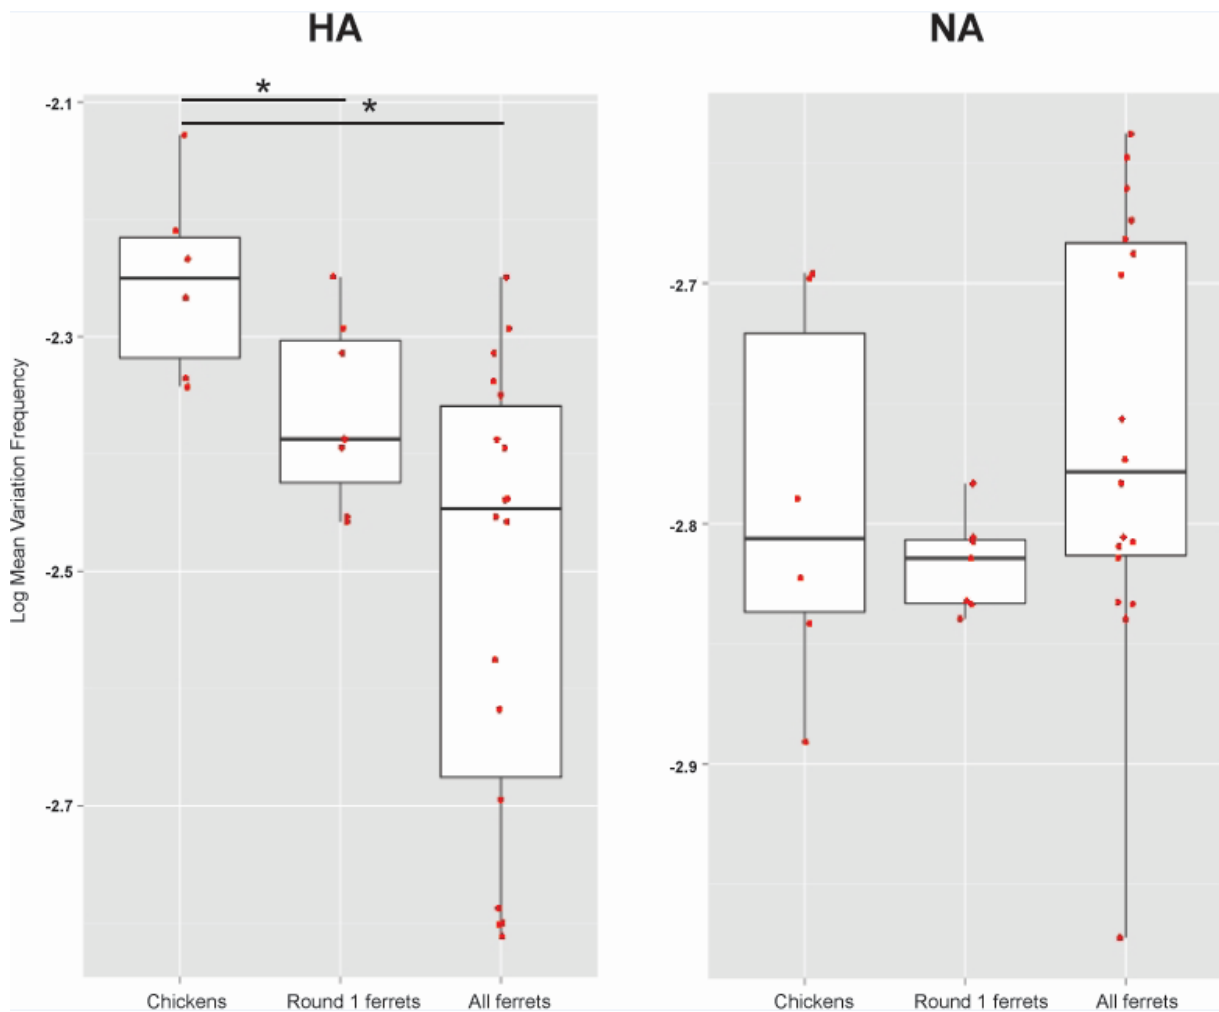

**Supplementary Figure 2 | Mean variation frequencies of HA and NA genes after virus**

**replication in chickens and ferrets.** “Round 1 ferrets” were inoculated with parental A/Anhui/1/13 (H7N9) influenza virus; “all ferrets” include donor and contact ferrets in rounds 1 and 2. Statistical comparisons were performed by using two-tailed Mann-Whitney U test,  $*P < 0.05$ .





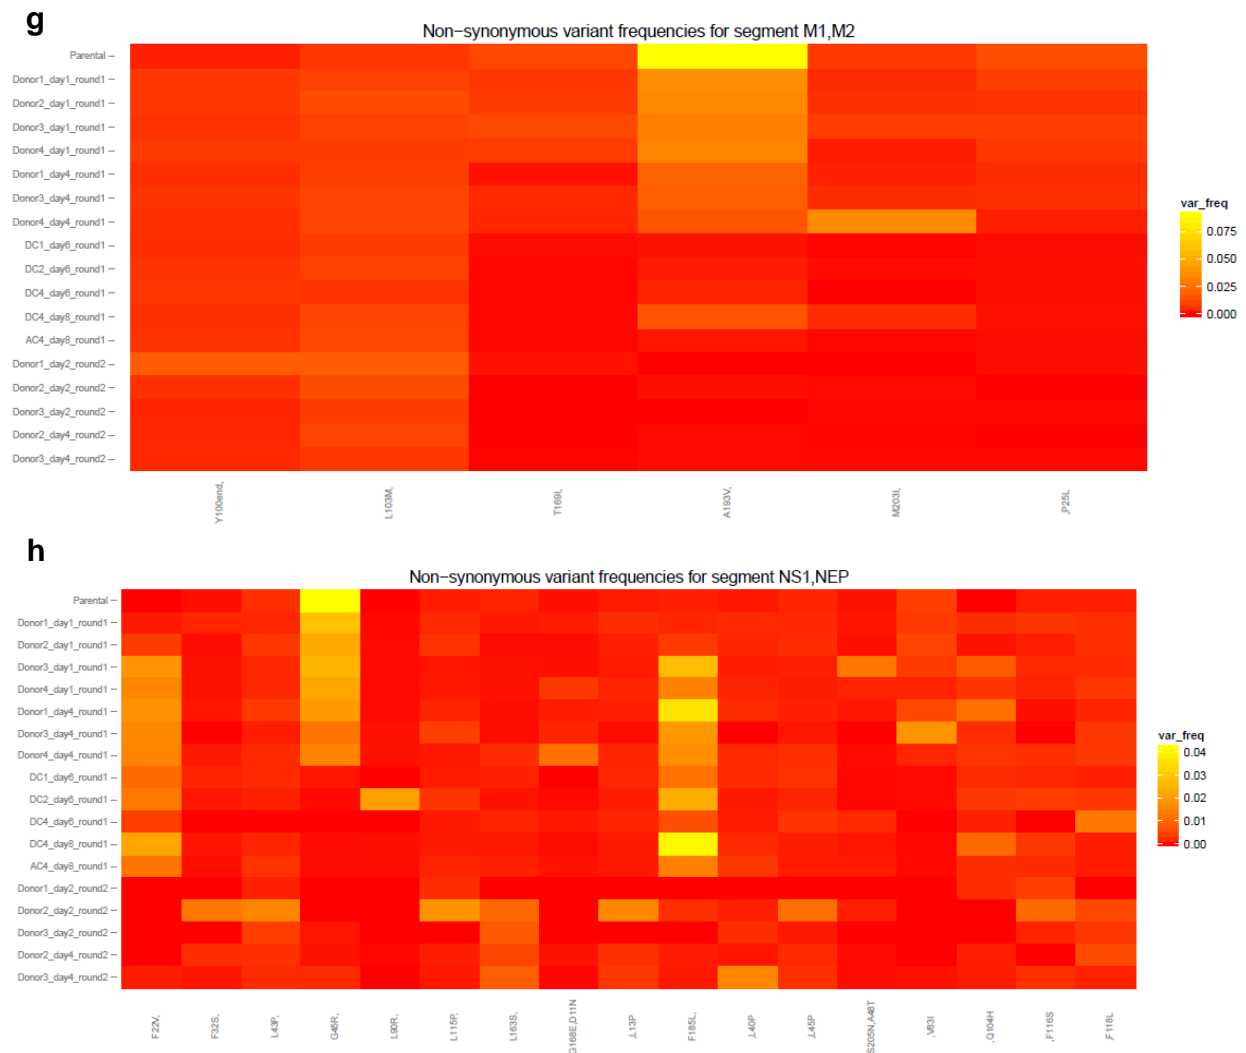

**Supplementary Figure 3 | Heat map of variations in the whole genome of A/Anhui/1/2013 (H7N9) influenza virus in ferrets.** Non-synonymous variant sequences for segments PB2 (a); PB1, PB1-F2 (b); PA, PA-X (c); HA (d); NP (e); NA (f); M1, M2 (g); and NS1, NEP (h) are shown. Parental virus is compared with viruses obtained in experimental rounds 1 and 2. Rows represent viruses from donor, direct contact (DC) and aerosol contact (AC) ferrets. Columns represent amino acid positions (counted from the start codon). Mutations in PA, M1, and NS1 genes are shown in black while those in PA-X, M2, and NS2 are in purple. Mutations with frequency  $> 0.01$  are shown.

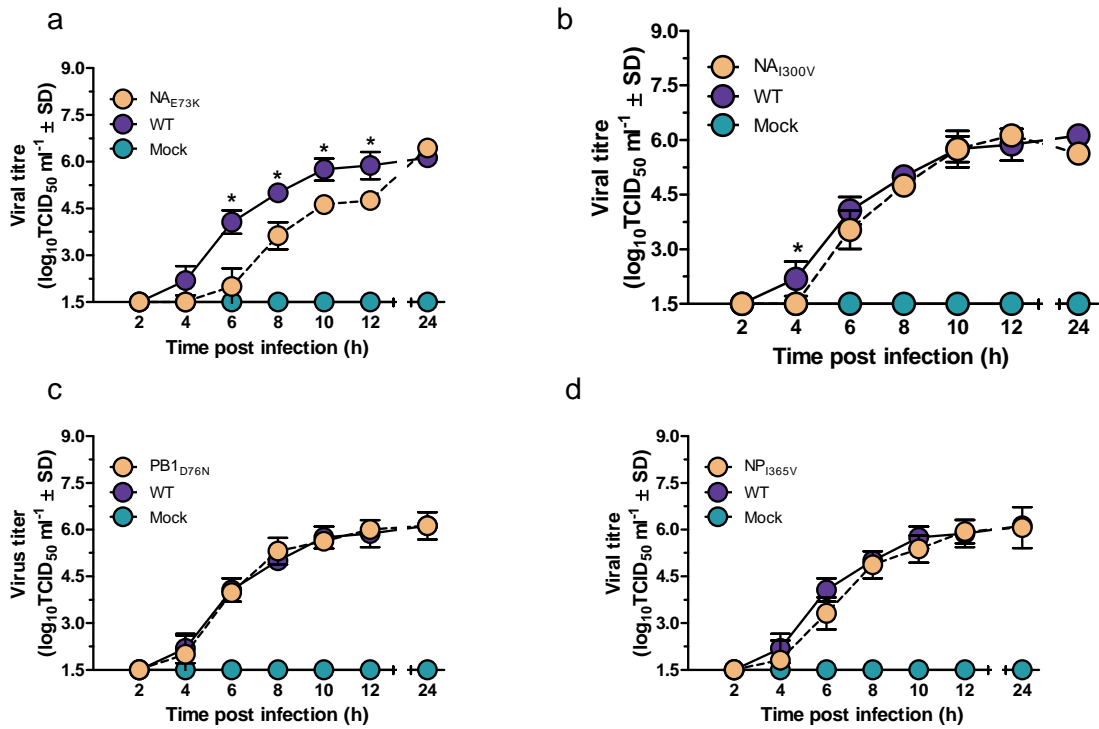

**Supplementary Figure 4 | Effect of identified amino acid substitutions in the NA, PB1, and NP on replication kinetics of A/Anhui/1/2013 (H7N9) influenza viruses *in vitro*.** Growth curves of the wild-type and the NA<sub>E73K</sub> (**a**), NA<sub>I300V</sub> (**b**), PB1<sub>D76N</sub> (**c**), and NP<sub>I365V</sub> (**d**) rg-A/Anhui/1/2013 (H7N9) influenza viruses using MOI 1 TCID<sub>50</sub> per cell in MDCK cells at 37°C. Values are mean and SD from two independent experiments (n= 4). \*<0.05 compared to WT virus by 2-way ANOVA.

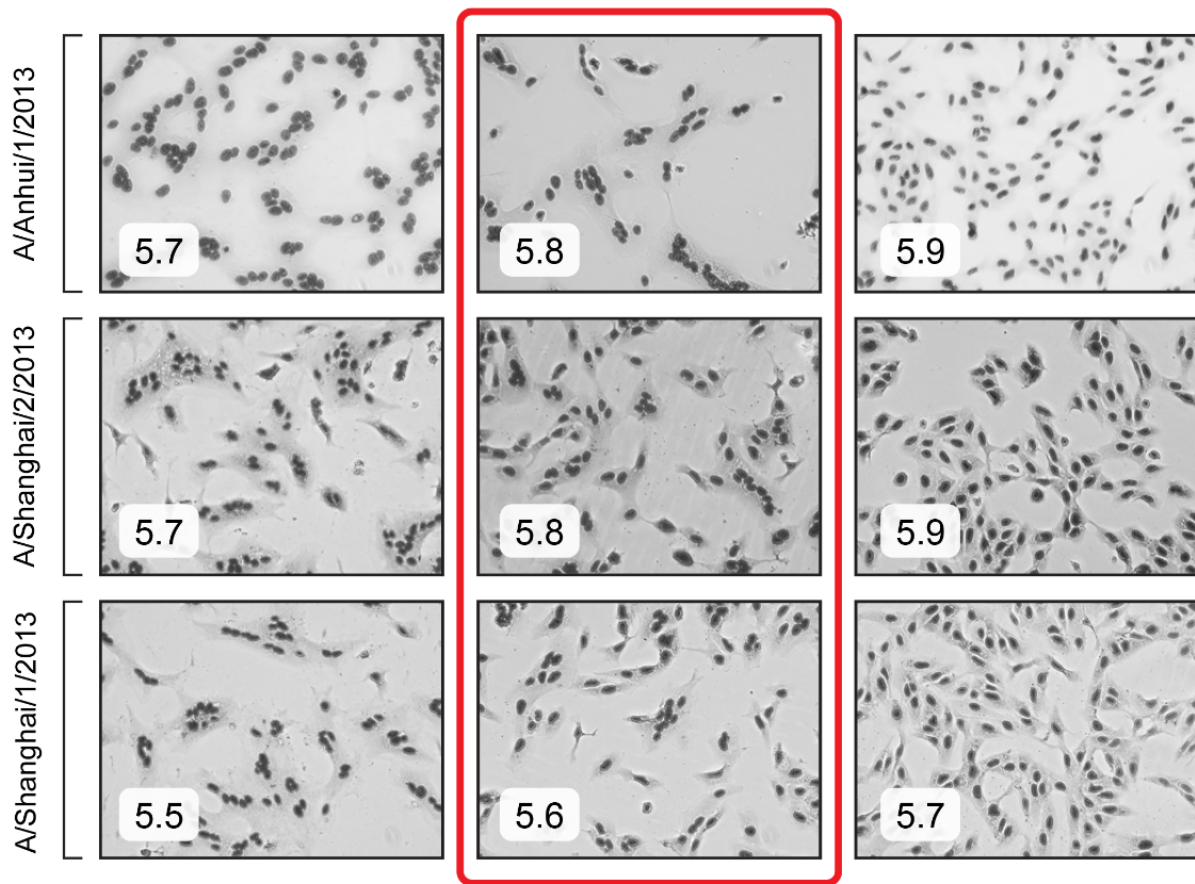

**Supplementary Figure 5 | Activation pH of the HA proteins of H7N9 influenza viruses.**

Vero cells were inoculated with the indicated viruses at an MOI of 5 TCID<sub>50</sub>/cell. Cells were then treated with pH buffers at the indicated pH values, and syncytium formation was monitored. The highest pH at which syncytia were observed (boxed in red) was recorded as the pH of HA activation. Data is representative of two independent experiments.

1 **Supplementary Table 1 | Homology sequence analysis of A/Anhui/1/2013 (H7N9) influenza virus in comparison with H7N9**  
 2 **influenza viruses from birds and environment isolated during the first wave of the outbreak in China, 2013.**  
 3

| H7N9 virus<br>(isolated form birds and environment) | Date of<br>isolation | Segment <sup>a</sup> | Accession<br>No. <sup>b</sup> | % Nucleotide sequence<br>homology with<br>A/Anhui/1/2013 <sup>c</sup> | % Amino acid<br>sequence homology<br>with A/Anhui/1/2013 |
|-----------------------------------------------------|----------------------|----------------------|-------------------------------|-----------------------------------------------------------------------|----------------------------------------------------------|
| A/Chicken/Shanghai/S1053/2013                       | 2013-04-03           | PB2                  | EPI440682                     | 99.8                                                                  | 99.8                                                     |
|                                                     |                      | PB1                  | EPI440683                     | 100.0                                                                 | 100.0                                                    |
|                                                     |                      | PA                   | EPI440681                     | 99.8                                                                  | 99.6                                                     |
|                                                     |                      | HA                   | EPI440685                     | 99.3                                                                  | 98.7                                                     |
|                                                     |                      | NP                   | EPI440678                     | 100.0                                                                 | 100.0                                                    |
|                                                     |                      | NA                   | EPI440684                     | 99.8                                                                  | 100.0                                                    |
|                                                     |                      | MP                   | EPI440680                     | 99.9                                                                  | 100.0                                                    |
|                                                     |                      | NS                   | EPI440679                     | 99.9                                                                  | 100.0                                                    |
| A/Chicken/Zhejiang/SD033/2013                       | 2013-04-11           | PB2                  | EPI457746                     | 99.9                                                                  | 99.7                                                     |
|                                                     |                      | PB1                  | EPI457747                     | 100.0                                                                 | 100.0                                                    |
|                                                     |                      | PA                   | EPI457745                     | 100.0                                                                 | 100.0                                                    |
|                                                     |                      | HA                   | EPI457749                     | 99.9                                                                  | 100.0                                                    |
|                                                     |                      | NP                   | EPI457742                     | 100.0                                                                 | 100.0                                                    |
|                                                     |                      | NA                   | EPI457748                     | 99.9                                                                  | 99.8                                                     |
|                                                     |                      | MP                   | EPI457744                     | 98.3                                                                  | 99.3                                                     |
|                                                     |                      | NS                   | EPI457743                     | 99.9                                                                  | 100.                                                     |
| A/Environment/Shanghai/S1088/2013                   | 2013-04-03           | PB2                  | EPI440690                     | 99.9                                                                  | 99.8                                                     |
|                                                     |                      | PB1                  | EPI440691                     | 100.0                                                                 | 100.0                                                    |
|                                                     |                      | PA                   | EPI440689                     | 99.4                                                                  | 98.7                                                     |
|                                                     |                      | HA                   | EPI440693                     | 99.4                                                                  | 99.1                                                     |
|                                                     |                      | NP                   | EPI440686                     | 100.0                                                                 | 100.                                                     |
|                                                     |                      | NA                   | EPI440692                     | 99.9                                                                  | 100.0                                                    |
|                                                     |                      | MP                   | EPI440688                     | 99.7                                                                  | 99.8                                                     |
|                                                     |                      | NS                   | EPI440687                     | 99.9                                                                  | 100.0                                                    |
| A/Pigeon/Shanghai/S1069/2013                        | 2013-04-02           | PB2                  | EPI440698                     | 99.8                                                                  | 99.7                                                     |
|                                                     |                      | PB1                  | EPI440699                     | 100.0                                                                 | 100                                                      |
|                                                     |                      | PA                   | EPI440697                     | 99.8                                                                  | 99.6                                                     |
|                                                     |                      | HA                   | EPI440701                     | 99.8                                                                  | 100.0                                                    |



|                              |            |      |           |       |       |
|------------------------------|------------|------|-----------|-------|-------|
| A/Pigeon/Shanghai/S1423/2013 | 2013-04-03 | NP   | EPI440694 | 98.8  | 99.7  |
|                              |            | NA   | EPI440700 | 99.8  | 99.8  |
|                              |            | MP   | EPI440696 | 99.8  | 100   |
|                              |            | NS   | EPI440695 | 96.9  | 99.4  |
|                              |            | PB2  | EPI457626 | 99.9  | 99.8  |
|                              |            | PB1  | EPI457627 | 100.0 | 100.0 |
|                              |            | PA   | EPI457625 | 97.8  | 98.7  |
|                              |            | HA   | EPI457629 | 99.8  | 99.7  |
|                              |            | NP   | EPI457622 | 100.0 | 100.0 |
|                              |            | NA   | EPI457628 | 99.8  | 100.0 |
| MP                           | EPI457624  | 99.9 | 99.8      |       |       |
| NS                           | EPI457623  | 99.9 | 100.0     |       |       |

4

5 <sup>a</sup> PB2: RNA polymerase basic subunit 2; PB1: RNA polymerase basic subunit 1; PA: RNA polymerase acidic subunit; HA:

6 haemagglutinin; NP: nucleoprotein; NA: neuraminidase; MP: matrix gene; NS: non-structural gene.

7 <sup>b</sup> Sequence data used in this table were downloaded from GISAID, Global Initiative on Sharing Avian Influenza Data

8 (<http://platform.gisaid.org>)

9 <sup>c</sup> Homology analysis was performed using BioEdit software (<http://www.mbio.ncsu.edu/bioedit/bioedit.html>) Sequence Identity

10 Matrix tool.

11

12 **Supplementary Table 2 | Genetic diversity of A/Anhui/1/2013 (H7N9) influenza viruses in chickens.**

13

| Animal number    | Dpi | Gene segment                                                       |                                                              |                                                                                    |                                                                                                                                 |                                                                                   |                                        |                |    |
|------------------|-----|--------------------------------------------------------------------|--------------------------------------------------------------|------------------------------------------------------------------------------------|---------------------------------------------------------------------------------------------------------------------------------|-----------------------------------------------------------------------------------|----------------------------------------|----------------|----|
|                  |     | PB2                                                                | PB1                                                          | PA                                                                                 | HA                                                                                                                              | NP                                                                                | NA                                     | M              | NS |
|                  |     | — <sup>b</sup>                                                     | —                                                            | —                                                                                  | N141D<br>(0.4211),<br>A143T<br>(0.1250),<br>N167D<br>(0.5824),<br>L235Q<br>(0.2182),<br>Y501N<br>(0.1454),<br>Y501C<br>(0.1457) | A373T<br>(0.1277)                                                                 | T10I<br>(0.2283)                       | —              | —  |
| (Parental virus) | N/A |                                                                    |                                                              |                                                                                    |                                                                                                                                 |                                                                                   |                                        |                |    |
| 1                | 3   | N100D<br>(0.4203),<br>K627R<br>(0.1687),<br>L665P<br>(0.125530625) | N346S<br>(0.125),<br>V421A<br>(0.3125),<br>V609A<br>(0.1355) | T210N<br>(0.4737),<br>A255G<br>(0.3125),<br>E377G (0.100)                          | N141D<br>(0.6923),<br>N167D<br>(0.7945),<br>Q444L<br>(0.1477),<br>Y501N<br>(0.1874),<br>Y501C<br>(0.1884)                       | R26G<br>(0.4809),<br>R98K<br>(0.1094),<br>A284T<br>(0.1975),<br>A428T<br>(0.1407) | T50K<br>(0.1250),<br>K139N<br>(0.1677) | — <sup>a</sup> | —  |
|                  | 5   | R70G (0.1102)                                                      | —                                                            | P28L (0.1070),<br>S184N<br>(0.7272),<br>Q654stop<br>(0.1698),<br>R663G<br>(0.1709) | N141D<br>(0.4201),<br>A143T<br>(0.1203),<br>G151E<br>(0.1761),<br>N167D<br>(0.4350),<br>Y501N<br>(0.1935),<br>Y501C<br>(0.1935) | R99K<br>(0.2261),<br>A373T<br>(0.1207),<br>R446K<br>(0.1058)                      | —                                      | —              | —  |

|   |   |                                                          |                                                              |                   |                                                                                                                                                                              |                    |                  |                                                               |   |
|---|---|----------------------------------------------------------|--------------------------------------------------------------|-------------------|------------------------------------------------------------------------------------------------------------------------------------------------------------------------------|--------------------|------------------|---------------------------------------------------------------|---|
| 2 | 3 | K48R<br>(0.1020),<br>W98stop<br>(0.72),<br>D275E (0.125) | —                                                            | E623K<br>(0.3325) | N141D<br>(0.4225),<br>A143T<br>(0.1509),<br>N167D<br>(0.5347),<br>N208D<br>(0.1339),<br>A310T<br>(0.1724),<br>G475D<br>(0.36951),<br>Y501N<br>(0.1598),<br>Y501C<br>(0.1598) | —                  | —                | —                                                             | — |
|   | 5 | —                                                        | —                                                            | —                 | N141D<br>(0.6972),<br>N167D<br>(0.5634),<br>Y501Y<br>(0.1596),<br>Y501C<br>(0.1586)                                                                                          | —                  | T10I<br>(0.2241) | M165I<br>(0.1438),<br>M192I<br>(0.1846),<br>A193V<br>(0.1969) | — |
| 3 | 3 | M90T (0.2526)                                            | K54E<br>(0.6257),<br>M523I<br>(0.6470),<br>Q569K<br>(0.1161) | Y110H<br>(0.1724) | N141D<br>(0.7217),<br>N167D<br>(0.6614),<br>L235Q<br>(0.8971),<br>Y501N<br>(0.2537),<br>Y501C<br>(0.2529),<br>G520V<br>(0.1451)                                              | A284T<br>(0.1267), | —                | —                                                             | — |

|   |   |                                     |   |                                                                                                                                  |                   |                   |   |   |
|---|---|-------------------------------------|---|----------------------------------------------------------------------------------------------------------------------------------|-------------------|-------------------|---|---|
| 5 | — | F94L (0.1726),<br>L108F<br>(0.1274) | — | N141D<br>(0.2786),<br>N167D<br>(0.3247),<br>L235Q<br>(0.1111),<br>K414R<br>(0.1111),<br>Y501N<br>(0.46939),<br>Y501C<br>(0.4694) | A373T<br>(0.1265) | S119P<br>(0.1097) | — | — |
|---|---|-------------------------------------|---|----------------------------------------------------------------------------------------------------------------------------------|-------------------|-------------------|---|---|

---

14 Three 6-week-old, specific pathogen-free chickens were inoculated with  $10^6$  EID<sub>50</sub> of virus in 0.5 ml PBS via natural routes (nares,  
15 trachea, eyes). RNA was extracted from oropharyngeal swabs on the indicated days post-inoculation (dpi) and influenza virus genes  
16 were amplified and sequenced. Shown are all amino acid variations that differed from the consensus parental sequence and were  
17 present at a frequency  $\geq 0.1$ .  
18 —, no nonsynonymous mutations were observed at a frequency  $\geq 0.1$ .

19 **Supplementary Table 3 | Ferret serum hemagglutination inhibition titers.**

| A/Anhui/1/2013<br>(H7N9) virus | Serum HI titer (HAU 50 $\mu\text{l}^{-1}$ ) |     |    |     |                      |     |     |     |                       |     |     |     |
|--------------------------------|---------------------------------------------|-----|----|-----|----------------------|-----|-----|-----|-----------------------|-----|-----|-----|
|                                | After inoculation                           |     |    |     | After direct contact |     |     |     | After aerosol contact |     |     |     |
|                                | D1                                          | D2  | D3 | D4  | DC1                  | DC2 | DC3 | DC4 | AC1                   | AC2 | AC3 | AC4 |
| Parental                       | 160                                         | 80  | 40 | 160 | 160                  | 320 | 160 | 40  | <                     | <   | 10  | 40  |
| AC                             | 80                                          | 160 | <  | ND  | ND                   | ND  | ND  | ND  | <                     | <   | <   | ND  |

20 Titers are reciprocal values. HAU, hemagglutinating units. D, donor; DC, direct contact; AC aerosol contact; <, below the lower limit of detection  
 21 (10 HAU/50  $\mu\text{l}$ ); ND, not determined.

22

23 **Supplementary Table 4 | Variation frequency of A/Anhui/1/2013 (H7N9) influenza virus after inoculation of ferrets and**  
 24 **chickens.**  
 25

| Animal model | Experiment round | Group          | Animal no.      | DPI | Total variation frequency (log) | HA variation frequency (log) | NA variation frequency (log) |              |              |
|--------------|------------------|----------------|-----------------|-----|---------------------------------|------------------------------|------------------------------|--------------|--------------|
| N/A          | N/A              | Parental virus | N/A             | N/A | -2.905440162                    | -2.338603516                 | -2.972306897                 |              |              |
| Ferrets      | 1                | Donor          | D1              | 1   | -2.806927772                    | -2.457879004                 | -2.833868038                 |              |              |
|              |                  |                |                 | 4   | -2.742696441                    | -2.453907496                 | -2.805941954                 |              |              |
|              |                  |                | D2              | 1   | -2.816327184                    | -2.387386966                 | -2.783279964                 |              |              |
|              |                  |                |                 | 4   | -2.769769832                    | -2.394822726                 | -2.81441596                  |              |              |
|              |                  |                | D3              | 1   | -2.769769832                    | -2.394822726                 | -2.81441596                  |              |              |
|              |                  |                |                 | 4   | -2.776612542                    | -2.292597553                 | -2.807442559                 |              |              |
|              |                  |                | D4              | 1   | -2.802506048                    | -2.24905896                  | -2.832470569                 |              |              |
|              |                  |                |                 | 4   | -2.774978978                    | -2.313737707                 | -2.839594171                 |              |              |
|              |                  |                | Direct Contact  | 6   | DC1                             | 6                            | -2.772057833                 | -2.438035302 | -2.756583119 |
|              |                  |                |                 |     |                                 | 6                            | -2.748001965                 | -2.439238638 | -2.773588496 |
|              |                  |                |                 |     |                                 | 6                            | -2.841064242                 | -2.811259698 | -2.637607146 |
|              |                  |                | Aerosol Contact | 8   | DC4                             | 8                            | -2.779612706                 | -2.787387123 | -2.696347657 |
|              |                  |                |                 |     |                                 | 8                            | -2.837547661                 | -2.349990787 | -2.809618722 |
|              |                  |                |                 |     |                                 | 8                            | -2.837547661                 | -2.349990787 | -2.809618722 |
|              |                  |                | Donor           | 2   | D1-2                            | 2                            | -2.832660393                 | -2.617216784 | -2.660533406 |
| 2            | -2.846847365     | -2.575942667   |                 |     |                                 | -2.687619251                 |                              |              |              |
| 4            | -2.847458857     | -2.694908903   |                 |     |                                 | -2.673835236                 |                              |              |              |
| 2            | -2.851934700     | -2.801427075   |                 |     |                                 | -2.681704602                 |                              |              |              |

|         |     |     |   |   |              |              |              |
|---------|-----|-----|---|---|--------------|--------------|--------------|
|         |     |     |   | 4 | -2.841801531 | -2.799644372 | -2.647563697 |
| Chicken | N/A | N/A | 1 | 3 | -2.634408252 | -2.233465376 | -2.841465687 |
| s       |     |     |   | 5 | -2.675060293 | -2.127884799 | -2.891189157 |
|         |     |     | 3 | 3 | -2.67762697  | -2.209500848 | -2.697862833 |
|         |     |     |   | 5 | -2.736429542 | -2.342424772 | -2.822763484 |
|         |     |     | 4 | 3 | -2.659243758 | -2.335177799 | -2.695671659 |
|         |     |     |   | 5 | -2.764034125 | -2.266838626 | -2.789758423 |

26 Three- to 4-month-old male ferrets were inoculated intranasally with  $10^6$  TCID<sub>50</sub> of virus. Four 6-week-old, specific-pathogen-free  
27 chickens were inoculated with  $10^6$  50% egg infectious doses (EID<sub>50</sub>). Viral genes were amplified and sequenced from RNA extracted  
28 from nasal washes (ferrets) or oropharyngeal swabs (chickens) on the indicated day pi. Mean variation frequency for each sample was  
29 calculated using positions that are variable in at least one of the examined samples. If a site has a minor variant frequency above zero  
30 in any of the samples this was included in the nominator and the denominator of the proportion was the total number of variable sites  
31 that was variable in all samples. Variation frequency was expressed as the negative log.  
32 DPI, day post-inoculation when mutation was detected; N/A, not applicable.  
33





|          |                            |             |          |   |                  |   |                                                                         |                                         |                                                                                  |   |   |
|----------|----------------------------|-------------|----------|---|------------------|---|-------------------------------------------------------------------------|-----------------------------------------|----------------------------------------------------------------------------------|---|---|
|          |                            | <b>DC4</b>  | <b>6</b> | — | D76N<br>(0.5316) | — | N141D (0.1818),<br>N167D (0.4178),<br>A228E (0.1173),<br>L235Q (0.1737) | L193M<br>(0.1111),<br>M352I<br>(0.1887) | R103K<br>(0.9576)<br>T10I<br>(0.2404),<br>I26M<br>(0.1266),<br>N340I<br>(0.1511) | — | — |
|          |                            |             | <b>8</b> | — | D76N<br>(0.2793) | — | N141D (0.2464),<br>N167D (0.5005),<br>A228E (0.1004),<br>L235Q (0.1174) | —                                       | —                                                                                | — | — |
|          | <b>Aerosol<br/>Contact</b> | <b>AC4</b>  | <b>8</b> | — | D76N<br>(0.4320) | — | —                                                                       | I365V<br>(0.6387)                       | E73K<br>(0.4058),<br>I300V<br>(0.4103)                                           | — | — |
| <b>2</b> | <b>Donor</b>               | <b>D1-2</b> | <b>2</b> | — | D76N<br>(0.3177) | — | K414E (0.1563),<br>Y501N (0.3182),<br>Y501C (0.3182)                    | I365V<br>(0.6163)                       | E73K<br>(0.3941),<br>I300V<br>(0.3451)                                           | — | — |
|          | <b>Donor</b>               | <b>D2-2</b> | <b>2</b> | — | D76N<br>(0.3887) | — | Y501N (0.3137),<br>Y501C (0.3137)                                       | I365V<br>(0.6236)                       | E73K<br>(0.4348),<br>I300V<br>(0.3739)                                           | — | — |
|          |                            |             | <b>4</b> | — | D76N<br>(0.2604) | — | —                                                                       | I365V<br>(0.4976)                       | E73K<br>(0.2933),<br>I300V<br>(0.2848)                                           | — | — |
|          |                            | <b>D3-2</b> | <b>2</b> | — | D76N<br>(0.2993) | — | K414E (0.1455),<br>Y501N (0.1783),<br>Y501C (0.1719)                    | I365V<br>(0.6174)                       | E73K<br>(0.3309),<br>I300V<br>(0.4053)                                           | — | — |
|          |                            |             | <b>4</b> | — | D76N<br>(0.2016) | — | Y501N (0.1449),<br>Y501C (0.1439)                                       | I365V<br>(0.5547)                       | E73K<br>(0.4471),<br>I300V<br>(0.4426)                                           | — | — |

37 Three to 4-month-old male ferrets were inoculated intranasally with  $10^6$  TCID<sub>50</sub> of virus. Viral genes were amplified and sequenced  
38 from RNA extracted from nasal washes on the indicated day pi. Shown are all amino acid variations that differed from the consensus  
39 parental sequence and were present at a frequency of  $\geq 0.1$ . Numbers in parentheses indicate the frequency at which each mutation  
40 occurred under each condition.  
41 DPI, day post inoculation when mutation was detected; NA, not applicable; –, no nonsynonymous mutations were detected at a  
42 frequency  $\geq 0.1$ .  
43  
44

45 **Supplementary Table 6 | List of primers used in the study.**

| <b>Primer</b>    | <b>Description</b>                                            | <b>Sequence (5' → 3')</b>                                        |
|------------------|---------------------------------------------------------------|------------------------------------------------------------------|
| N9 E73K F        | E73K site-directed mutagenesis                                | CAAACATCACCAACATCCAAATGAAAGAGAGAACAAG                            |
| N9 E73K R        | E73K site-directed mutagenesis                                | GAAATTCCTGCTTGTTCTCTCTTTCATTTGGATGTTG                            |
| N9 I300V F       | I300V site-directed mutagenesis                               | GCAGGGCTCAAATAGACCAGTGGTTCAGATAGACCC                             |
| N9 I300V R       | I300V site-directed mutagenesis                               | GTGTCATTGCTACTGGGTCTATCTGAACCACTGGTCTATTTG                       |
| N9 ClaI/- F      | ClaI site deletion                                            | GTGGACCAGCAATAGTATAGTTTCGATGTGTTCCAGTACAG                        |
| N9 ClaI/- R      | ClaI site deletion                                            | CCAGGAATTCTGTACTGGAACACATCGAAACTATACTATTGC                       |
| PB2 K627E F      | K627E site-directed mutagenesis                               | CCATTTGCAGCAGCCCCGCCGAGCAGAGTAGG                                 |
| PB2 K627E R      | K627E site-directed mutagenesis                               | CGGCGGGGCTGCTGCAAATGGTAATAGCTT                                   |
| PB1 D76N F       | D76N site-directed mutagenesis                                | ATTGATGGACCATTACCTGAGAACAACGAGCCGA                               |
| PB1 D76N R       | D76N site-directed mutagenesis                                | CTCAGGTAATGGTCCATCAATTGGATTGAGT                                  |
| I365V F          | I365V site-directed mutagenesis                               | GCTATCCACTAGAGGGGTTCAAGTTGCTTCAAAT                               |
| I365V R          | I365V site-directed mutagenesis                               | TTGAACCCCTCTAGTGGATAGCTGTCCTCTT                                  |
| N9 ClaI F        | N-terminal ClaI restriction site insertion for pCAAGS cloning | TTACCATCGATATGAATCCAAATCAGAAGATTC                                |
| N9 NheI HA-tag R | C-terminal NheI restriction site and HA-tag insertion         | TTTCGCGCTAGCTTAAGCGTAATCTGGAACATCGTATGGGTAGAGGAAGTACTCTATTTTAGCC |
| N9 NheI R        | C-terminal NheI restriction site insertion                    | TTTCGCGCTAGCTTAGAGGAAGTACTCTATTTTAGCC                            |

47 **Supplementary Table 7 | List of sialic acid-containing glycans used in glycan arrays**

48

| Chart number | Name                                                                                                                                                                                             | NeuAc $\alpha$ - | Type     | Sulfated  |
|--------------|--------------------------------------------------------------------------------------------------------------------------------------------------------------------------------------------------|------------------|----------|-----------|
| 1            | Gal $\beta$ (1-4)-GlcNAc $\beta$ -ethyl-NH <sub>2</sub>                                                                                                                                          | —                | Type 2   |           |
| 2            | Gal $\beta$ (1-4)-GlcNAc $\beta$ (1-2)-Man $\alpha$ (1-3)-[Gal $\beta$ (1-4)-GlcNAc $\beta$ (1-2)-Man $\alpha$ (1-6)]-Man $\beta$ (1-4)-GlcNAc $\beta$ (1-4)-GlcNAc $\beta$ -Asn-NH <sub>2</sub> | —                | N        |           |
| 3            | NeuAc $\alpha$ (2-3)-Gal $\beta$ (1-4)-6-O-sulfo-GlcNAc $\beta$ -propyl-NH <sub>2</sub>                                                                                                          | 3                | Type 2   | 6S-GlcNAc |
| 4            | NeuAc $\alpha$ (2-3)-Gal $\beta$ (1-4)-[Fuca(1-3)]-6-O-sulfo-GlcNAc $\beta$ -propyl-NH <sub>2</sub>                                                                                              | 3                | Type 2   | 6S-GlcNAc |
| 5            | NeuAc $\alpha$ (2-3)-6-O-sulfo-Gal $\beta$ (1-4)-GlcNAc $\beta$ -ethyl-NH <sub>2</sub>                                                                                                           | 3                | Type 2   | 6S-Gal    |
| 6            | NeuAc $\alpha$ (2-3)-6-O-sulfo-Gal $\beta$ (1-4)-[Fuca(1-3)]-GlcNAc $\beta$ -propyl-NH <sub>2</sub>                                                                                              | 3                | Type 2   | 6S-Gal    |
| 7            | NeuAc $\alpha$ (2-3)-Gal $\beta$ (1-3)-6-O-sulfo-GlcNAc $\beta$ -propyl-NH <sub>2</sub>                                                                                                          | 3                | Type 1   | 6S-GlcNAc |
| 8            | NeuAc $\alpha$ (2-3)-Gal $\beta$ (1-4)-Glc $\beta$ -ethyl-NH <sub>2</sub>                                                                                                                        | 3                | Lacto    |           |
| 9            | NeuAc $\alpha$ (2-3)-Gal $\beta$ (1-4)-GlcNAc $\beta$ -ethyl-NH <sub>2</sub>                                                                                                                     | 3                | Type 2   |           |
| 10           | NeuAc $\alpha$ (2-3)-Gal $\beta$ (1-4)-GlcNAc $\beta$ (1-3)-Gal $\beta$ (1-4)-GlcNAc $\beta$ -ethyl-NH <sub>2</sub>                                                                              | 3                | Type 2   |           |
| 11           | NeuAc $\alpha$ (2-3)-Gal $\beta$ (1-4)-GlcNAc $\beta$ (1-3)-Gal $\beta$ (1-4)-GlcNAc $\beta$ (1-3)-Gal $\beta$ (1-4)-GlcNAc $\beta$ -ethyl-NH <sub>2</sub>                                       | 3                | Type 2   |           |
| 12           | NeuAc $\alpha$ (2-3)-GalNAc $\beta$ (1-4)-GlcNAc $\beta$ -ethyl-NH <sub>2</sub>                                                                                                                  | 3                | LacDiNAc |           |
| 13           | NeuAc $\alpha$ (2-3)-Gal $\beta$ (1-3)-GlcNAc $\beta$ -ethyl-NH <sub>2</sub>                                                                                                                     | 3                | Type 1   |           |
| 14           | NeuAc $\alpha$ (2-3)-Gal $\beta$ (1-3)-GlcNAc $\beta$ (1-3)-Gal $\beta$ (1-4)-GlcNAc $\beta$ -ethyl-NH <sub>2</sub>                                                                              | 3                | Type 2   |           |

|    |                                                                                                                                                                                                                                            |   |        |
|----|--------------------------------------------------------------------------------------------------------------------------------------------------------------------------------------------------------------------------------------------|---|--------|
| 15 | NeuAca(2-3)-Galβ(1-3)-GlcNAcβ(1-3)-Galβ(1-3)-GlcNAcβ-ethyl-NH <sub>2</sub>                                                                                                                                                                 | 3 | Type 1 |
| 16 | NeuAca(2-3)-Galβ(1-3)-GalNAcβ(1-3)-Gala(1-4)-Galβ(1-4)-Glcβ-ethyl-NH <sub>2</sub>                                                                                                                                                          | 3 | Lacto  |
| 17 | NeuAca(2-3)-Galβ(1-3)-GalNAcα-Thr-NH <sub>2</sub>                                                                                                                                                                                          | 3 | Core 1 |
| 18 | NeuAca(2-3)-Galβ(1-3)-[GlcNAcβ(1-6)]-GalNAcα-Thr-NH <sub>2</sub>                                                                                                                                                                           | 3 | Core 2 |
| 19 | NeuAca(2-3)-Galβ(1-4)-GlcNAcβ(1-6)-[Galβ(1-3)]-GalNAcα-Thr-NH <sub>2</sub>                                                                                                                                                                 | 3 | Core 2 |
| 20 | NeuAca(2-3)-Galβ(1-4)-GlcNAcβ(1-3)-Galβ(1-4)-GlcNAcβ(1-6)-[Galβ(1-3)]-GalNAcα-Thr-NH <sub>2</sub>                                                                                                                                          | 3 | Core 2 |
| 21 | NeuAca(2-3)-Galβ(1-4)-GlcNAcβ(1-3)-GalNAcα-Thr-NH <sub>2</sub>                                                                                                                                                                             | 3 | Core 3 |
| 22 | NeuAca(2-3)-Galβ(1-4)-GlcNAcβ(1-3)-Galβ(1-4)-GlcNAcβ(1-3)-GalNAcα-Thr-NH <sub>2</sub>                                                                                                                                                      | 3 | Core 3 |
| 23 | NeuAca(2-3)-Galβ(1-4)-GlcNAcβ(1-3)-[NeuAca(2-3)-Galβ(1-4)-GlcNAcβ(1-6)]-GalNAcα-Thr-NH <sub>2</sub>                                                                                                                                        | 3 | Core 4 |
| 24 | NeuAca(2-3)-Galβ(1-4)-GlcNAcβ(1-3)-Galβ(1-4)-GlcNAcβ(1-3)-[NeuAca(2-3)-Galβ(1-4)-GlcNAcβ(1-3)-Galβ(1-4)-GlcNAcβ(1-6)]-GalNAcα-Thr-NH <sub>2</sub>                                                                                          | 3 | Core 4 |
| 25 | NeuAca(2-3)-Galβ(1-4)-GlcNAcβ(1-2)-Manα(1-3)-[NeuAca(2-3)-Galβ(1-4)-GlcNAcβ(1-2)-Manα(1-6)]-Manβ(1-4)-GlcNAcβ(1-4)-GlcNAcβ-Asn-NH <sub>2</sub>                                                                                             | 3 | N      |
| 26 | NeuAca(2-3)-Galβ(1-4)-GlcNAcβ(1-3)-Galβ(1-4)-GlcNAcβ(1-2)-Manα(1-3)-[NeuAca(2-3)-Galβ(1-4)-GlcNAcβ(1-3)-Galβ(1-4)-GlcNAcβ(1-2)-Manα(1-6)]-Manβ(1-4)-GlcNAcβ(1-4)-GlcNAcβ-Asn-NH <sub>2</sub>                                               | 3 | N      |
| 27 | NeuAca(2-3)-Galβ(1-4)-GlcNAcβ(1-3)-Galβ(1-4)-GlcNAcβ(1-3)-Galβ(1-4)-GlcNAcβ(1-2)-Manα(1-3)-[NeuAca(2-3)-Galβ(1-4)-GlcNAcβ(1-3)-Galβ(1-4)-GlcNAcβ(1-3)-Galβ(1-4)-GlcNAcβ(1-2)-Manα(1-6)]-Manβ(1-4)-GlcNAcβ(1-4)-GlcNAcβ-Asn-NH <sub>2</sub> | 3 | N      |

|    |                                                                                                                                                                                       |      |          |           |
|----|---------------------------------------------------------------------------------------------------------------------------------------------------------------------------------------|------|----------|-----------|
| 28 | NeuAca(2-3)-[GalNAc $\beta$ (1-4)]-Gal $\beta$ (1-4)-GlcNAc $\beta$ -ethyl-NH <sub>2</sub>                                                                                            | 3    | Type 2   |           |
| 29 | NeuAca(2-3)-[GalNAc $\beta$ (1-4)]-Gal $\beta$ (1-4)-Glc $\beta$ -ethyl-NH <sub>2</sub>                                                                                               | 3    | Ganglio  |           |
| 30 | Gal $\beta$ (1-3)-GalNAc $\beta$ (1-4)-[NeuAca(2-3)]-Gal $\beta$ (1-4)-Glc $\beta$ -ethyl-NH <sub>2</sub>                                                                             | 3    | Ganglio  |           |
| 31 | NeuAca(2-3)-Gal $\beta$ (1-4)-[Fuca(1-3)]-GlcNAc $\beta$ -propyl-NH <sub>2</sub>                                                                                                      | 3    | Type 2   |           |
| 32 | NeuAca(2-3)-Gal $\beta$ (1-3)-[Fuca(1-4)]-GlcNAc $\beta$ (1-3)-Gal $\beta$ (1-4)-[Fuca(1-3)]-GlcNAc $\beta$ -ethyl-NH <sub>2</sub>                                                    | 3    | Type 2   |           |
| 33 | NeuAca(2-3)-Gal $\beta$ (1-4)-[Fuca(1-3)]-GlcNAc $\beta$ (1-3)-Gal $\beta$ (1-4)-[Fuca(1-3)]-GlcNAc $\beta$ -ethyl-NH <sub>2</sub>                                                    | 3    | Type 2   |           |
| 34 | NeuAca(2-3)-Gal $\beta$ (1-4)-[Fuca(1-3)]-GlcNAc $\beta$ (1-3)-Gal $\beta$ (1-4)-[Fuca(1-3)]-GlcNAc $\beta$ (1-3)-Gal $\beta$ (1-4)-[Fuca(1-3)]-GlcNAc $\beta$ -ethyl-NH <sub>2</sub> | 3    | Type 2   |           |
| 35 | NeuGca(2-3)-Gal $\beta$ (1-4)-GlcNAc $\beta$ -ethyl-NH <sub>2</sub>                                                                                                                   | 3-Gc | Type 2   |           |
| 36 | NeuAca(2-6)-Gal $\beta$ (1-4)-6-O-sulfo-GlcNAc $\beta$ -propyl-NH <sub>2</sub>                                                                                                        | 6    | Type 2   | 6S-GlcNAc |
| 37 | NeuAca(2-6)-Gal $\beta$ (1-4)-Glc $\beta$ -ethyl-NH <sub>2</sub>                                                                                                                      | 6    | Lacto    |           |
| 38 | NeuAca(2-6)-Gal $\beta$ (1-4)-GlcNAc $\beta$ -ethyl-NH <sub>2</sub>                                                                                                                   | 6    | Type 2   |           |
| 39 | NeuAca(2-6)-Gal $\beta$ (1-4)-GlcNAc $\beta$ (1-3)-Gal $\beta$ (1-4)-GlcNAc $\beta$ -ethyl-NH <sub>2</sub>                                                                            | 6    | Type 2   |           |
| 40 | NeuAca(2-6)-Gal $\beta$ (1-4)-GlcNAc $\beta$ (1-3)-Gal $\beta$ (1-4)-GlcNAc $\beta$ (1-3)-Gal $\beta$ (1-4)-GlcNAc $\beta$ -ethyl-NH <sub>2</sub>                                     | 6    | Type 2   |           |
| 41 | NeuAca(2-6)-Gal $\beta$ (1-4)-GlcNAc $\beta$ (1-3)-[NeuAca(2-6)]-Gal $\beta$ (1-4)-GlcNAc $\beta$ -ethyl-NH <sub>2</sub>                                                              | 6    | Type 2   |           |
| 42 | NeuAca(2-6)-GalNAc $\beta$ (1-4)-GlcNAc $\beta$ -ethyl-NH <sub>2</sub>                                                                                                                | 6    | LacDiNAc |           |

|    |                                                                                                                                                                                                                                                                                                                          |   |        |
|----|--------------------------------------------------------------------------------------------------------------------------------------------------------------------------------------------------------------------------------------------------------------------------------------------------------------------------|---|--------|
| 43 | NeuAc $\alpha$ (2-6)-[Gal $\beta$ (1-3)]-GalNAc $\alpha$ -Thr-NH <sub>2</sub>                                                                                                                                                                                                                                            | 6 | Core 1 |
| 44 | NeuAc $\alpha$ (2-6)-Gal $\beta$ (1-4)-GlcNAc $\beta$ (1-6)-[Gal $\beta$ (1-3)]-GalNAc $\alpha$ -Thr-NH <sub>2</sub>                                                                                                                                                                                                     | 6 | Core 2 |
| 45 | NeuAc $\alpha$ (2-6)-Gal $\beta$ (1-4)-GlcNAc $\beta$ (1-3)-Gal $\beta$ (1-4)-GlcNAc $\beta$ (1-6)-[Gal $\beta$ (1-3)]-GalNAc $\alpha$ -Thr-NH <sub>2</sub>                                                                                                                                                              | 6 | Core 2 |
| 46 | NeuAc $\alpha$ (2-6)-Gal $\beta$ (1-4)-GlcNAc $\beta$ (1-3)-GalNAc $\alpha$ -Thr-NH <sub>2</sub>                                                                                                                                                                                                                         | 6 | Core 3 |
| 47 | NeuAc $\alpha$ (2-6)-Gal $\beta$ (1-4)-GlcNAc $\beta$ (1-3)-Gal $\beta$ (1-4)-GlcNAc $\beta$ (1-3)-GalNAc $\alpha$ -Thr-NH <sub>2</sub>                                                                                                                                                                                  | 6 | Core 3 |
| 48 | NeuAc $\alpha$ (2-6)-Gal $\beta$ (1-4)-GlcNAc $\beta$ (1-3)-[NeuAc $\alpha$ (2-6)-Gal $\beta$ (1-4)-GlcNAc $\beta$ (1-6)]-GalNAc $\alpha$ -Thr-NH <sub>2</sub>                                                                                                                                                           | 6 | Core 4 |
| 49 | NeuAc $\alpha$ (2-6)-Gal $\beta$ (1-4)-GlcNAc $\beta$ (1-3)-Gal $\beta$ (1-4)-GlcNAc $\beta$ (1-3)-[NeuAc $\alpha$ (2-6)-Gal $\beta$ (1-4)-GlcNAc $\beta$ (1-3)-Gal $\beta$ (1-4)-GlcNAc $\beta$ (1-6)]-GalNAc $\alpha$ -Thr-NH <sub>2</sub>                                                                             | 6 | Core 4 |
| 50 | Gal $\beta$ (1-4)-GlcNAc $\beta$ (1-2)-Man $\alpha$ (1-3)-[NeuAc $\alpha$ (2-6)-Gal $\beta$ (1-4)-GlcNAc $\beta$ (1-2)-Man $\alpha$ (1-6)]-Man $\beta$ (1-4)-GlcNAc $\beta$ (1-4)-GlcNAc $\beta$ -Asn-NH <sub>2</sub>                                                                                                    | 6 | N      |
| 51 | NeuAc $\alpha$ (2-6)-Gal $\beta$ (1-4)-GlcNAc $\beta$ (1-2)-Man $\alpha$ (1-3)-[Gal $\beta$ (1-4)-GlcNAc $\beta$ (1-2)-Man $\alpha$ (1-6)]-Man $\beta$ (1-4)-GlcNAc $\beta$ (1-4)-GlcNAc $\beta$ -Asn-NH <sub>2</sub>                                                                                                    | 6 | N      |
| 52 | GlcNAc $\beta$ (1-2)-Man $\alpha$ (1-3)-[NeuAc $\alpha$ (2-6)-Gal $\beta$ (1-4)-GlcNAc $\beta$ (1-2)-Man $\alpha$ (1-6)]-Man $\beta$ (1-4)-GlcNAc $\beta$ (1-4)-GlcNAc $\beta$ -Asn-NH <sub>2</sub>                                                                                                                      | 6 | N      |
| 53 | NeuAc $\alpha$ (2-6)-Gal $\beta$ (1-4)-GlcNAc $\beta$ (1-2)-Man $\alpha$ (1-3)-[NeuAc $\alpha$ (2-6)-Gal $\beta$ (1-4)-GlcNAc $\beta$ (1-2)-Man $\alpha$ (1-6)]-Man $\beta$ (1-4)-GlcNAc $\beta$ (1-4)-GlcNAc $\beta$ -Asn-NH <sub>2</sub>                                                                               | 6 | N      |
| 54 | NeuAc $\alpha$ (2-6)-Gal $\beta$ (1-4)-GlcNAc $\beta$ (1-3)-Gal $\beta$ (1-4)-GlcNAc $\beta$ (1-2)-Man $\alpha$ (1-3)-[NeuAc $\alpha$ (2-6)-Gal $\beta$ (1-4)-GlcNAc $\beta$ (1-3)-Gal $\beta$ (1-4)-GlcNAc $\beta$ (1-2)-Man $\alpha$ (1-6)]-Man $\beta$ (1-4)-GlcNAc $\beta$ (1-4)-GlcNAc $\beta$ -Asn-NH <sub>2</sub> | 6 | N      |

|    |                                                                                                                                                                                                                                                                                                                                                                                                        |      |        |
|----|--------------------------------------------------------------------------------------------------------------------------------------------------------------------------------------------------------------------------------------------------------------------------------------------------------------------------------------------------------------------------------------------------------|------|--------|
| 55 | NeuAc $\alpha$ (2-6)-Gal $\beta$ (1-4)-GlcNAc $\beta$ (1-3)-Gal $\beta$ (1-4)-GlcNAc $\beta$ (1-3)-Gal $\beta$ (1-4)-GlcNAc $\beta$ (1-2)-Man $\alpha$ (1-3)-[NeuAc $\alpha$ (2-6)-Gal $\beta$ (1-4)-GlcNAc $\beta$ (1-3)-Gal $\beta$ (1-4)-GlcNAc $\beta$ (1-3)-Gal $\beta$ (1-4)-GlcNAc $\beta$ (1-2)-Man $\alpha$ (1-6)]-Man $\beta$ (1-4)-GlcNAc $\beta$ (1-4)-GlcNAc $\beta$ -Asn-NH <sub>2</sub> | 6    | N      |
| 56 | NeuGc $\alpha$ (2-6)-Gal $\beta$ (1-4)-GlcNAc $\beta$ -ethyl-NH <sub>2</sub>                                                                                                                                                                                                                                                                                                                           | 6-Gc | Type 2 |
| 57 | NeuAc $\alpha$ (2-3)-Gal $\beta$ (1-4)-GlcNAc $\beta$ (1-2)-Man $\alpha$ (1-3)-[NeuAc $\alpha$ (2-6)-Gal $\beta$ (1-4)-GlcNAc $\beta$ (1-2)-Man $\alpha$ (1-6)]-Man $\beta$ (1-4)-GlcNAc $\beta$ (1-4)-GlcNAc $\beta$ -Asn-NH <sub>2</sub>                                                                                                                                                             | 3/6  | N      |
| 58 | NeuAc $\alpha$ (2-6)-Gal $\beta$ (1-4)-GlcNAc $\beta$ (1-2)-Man $\alpha$ (1-3)-[NeuAc $\alpha$ (2-3)-Gal $\beta$ (1-4)-GlcNAc $\beta$ (1-2)-Man $\alpha$ (1-6)]-Man $\beta$ (1-4)-GlcNAc $\beta$ (1-4)-GlcNAc $\beta$ -Asn-NH <sub>2</sub>                                                                                                                                                             | 3/6  | N      |

---
